# Supplementary material for: Nutrient Stability in NASA Spaceflight Experiment Rodent Food Bars
Source: MDPI journal article supplement (doi:10.3390/foods13244093), 2024-12-18
Supplement: s1 [file foods-3245240-supplementary.pdf › foods-3245240-supplementary.pdf]

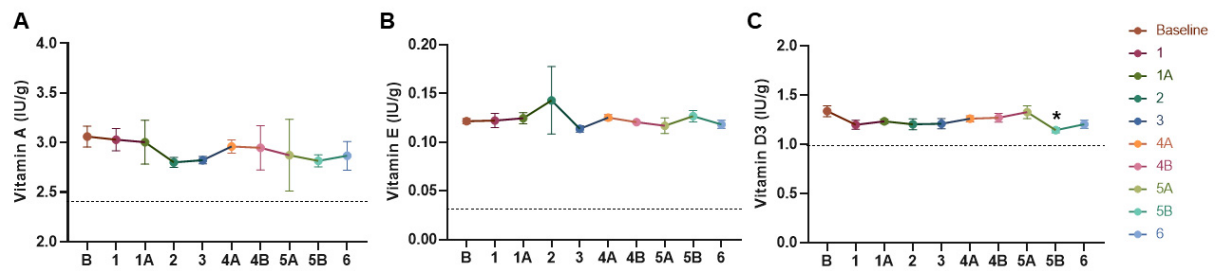

**Figure S1: Fat-soluble vitamin levels measured across different treatment groups.** Subtle non-significant fluctuations were noted in Vitamin A (A) and Vitamin E (B) levels compared to the baseline B. (C) Significant decrease in Vitamin D3 levels were observed in the 5B group (12 months refrigeration followed by 6 months at ambient temperature – Black \*) compared to the baseline-B. The dotted line corresponds to the NRC minimum requirements for the respective vitamins.

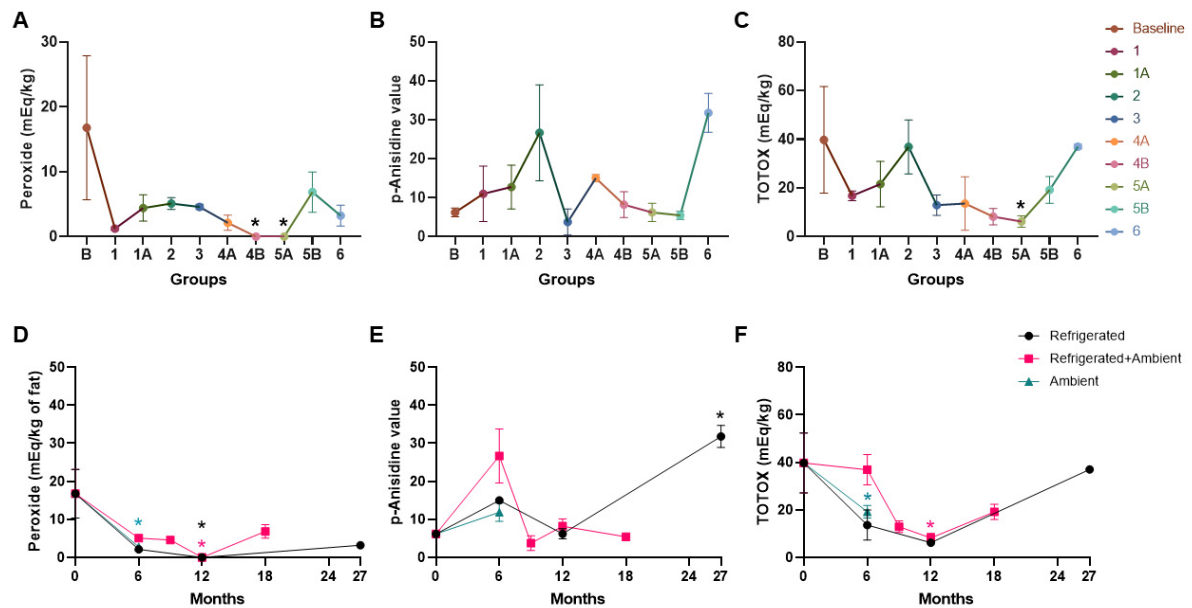

**Figure S2. Lipid oxidation in NuRFBs.** (A) A decreasing trend was observed in the peroxide levels across groups compared to the baseline, with significant decreases in groups 4B (6 months refrigeration followed by 6 months at ambient temperature,  $p=0.0047$ , Black \*) and 5A (12-month refrigeration,  $p=0.0047$ , Black \*) compared to the baseline-B. (B) Non-significant fluctuations in p-anisidine values were noted across all groups. (C) Fluctuations in TOTOX values were observed with a significant decrease in group 5A (12-month refrigeration,  $p=0.0363$ , Black \*) compared to the baseline-B. (D) A significant decrease in peroxide levels was observed at the 6-month time point in ambient ( $p=0.0238$ , Teal \*), and at the 12-month time point in refrigerated ( $p=0.0062$ , Black \*) and refrigerated+ambient ( $p=0.0074$ , Pink \*) storage conditions. (E) Significant increases in p-anisidine values were noted at the 27-month ( $p=0.05$ , – Black \*) time point in refrigerated storage conditions. (F) Significant decreases in TOTOX values were observed at the 6-month time point in ambient ( $p=0.0476$ , Teal), and at the 12-month point in refrigerated+ambient ( $p=0.0423$ , Pink \*) storage conditions.

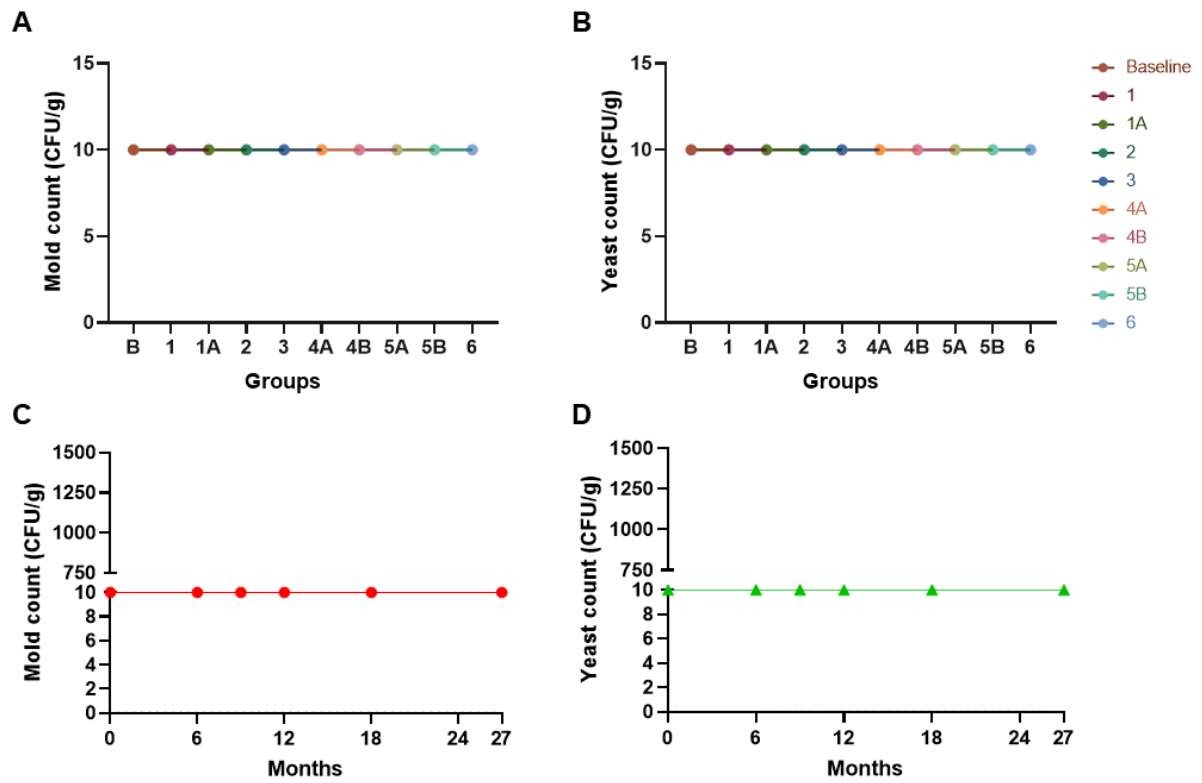

**Figure S3: Yeast and mold counts in NuRFBs.** No significant changes were observed in mold (A, C) and yeast (B, D) counts across the groups and over time.

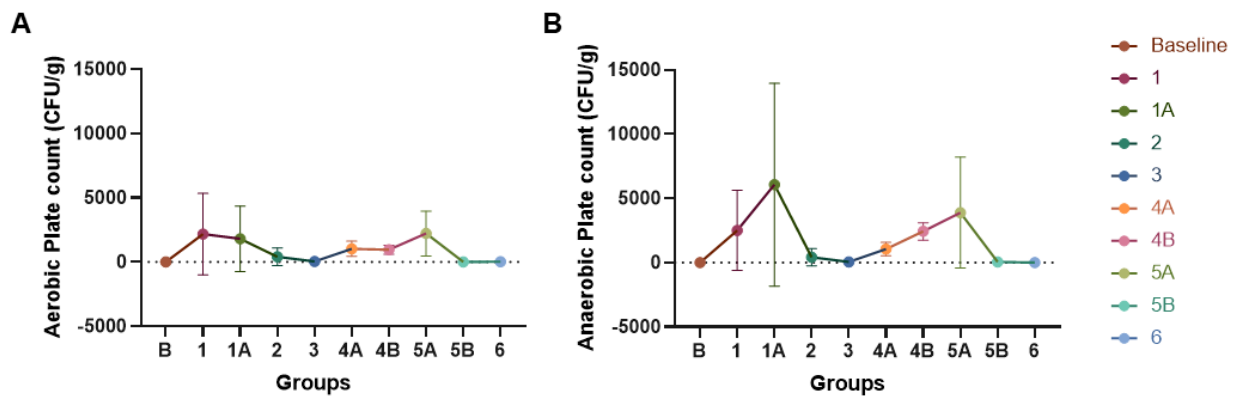

**Figure S4: Microbial plate counts measured across different treatment groups.** No significant changes were observed in aerobic (A) and anaerobic (B) plate counts across the groups.
